# Supplementary material for: Using reference-free compressed data structures to analyze sequencing reads from thousands of human genomes
Source: HighWire-hosted journal article supplement (doi:10.1101/gr.211748.116), 2016-12-16
Supplement: Supplemental_Fig_S1.pdf [file Supplemental_Fig_S1.pdf]

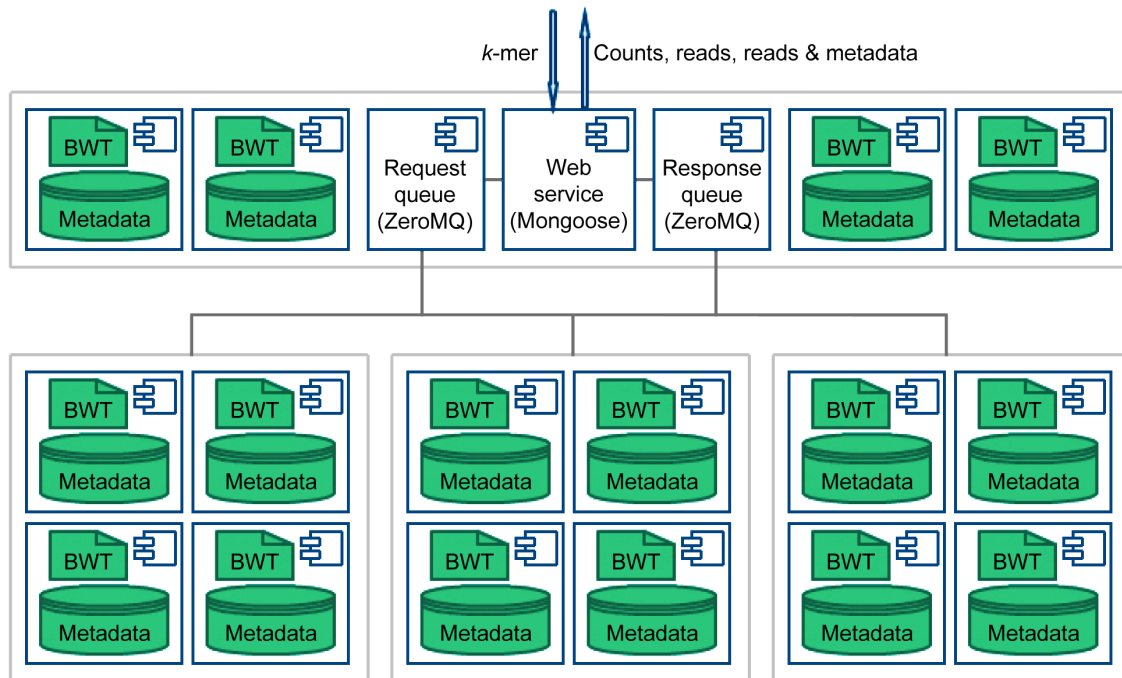

**Supplemental Fig S1.** Server diagram where each grey box represents a physical machine. The web server application that handles  $k$ -mer requests is Mongoose (<https://github.com/cesanta/mongoose>) and communication within the server is via ZeroMQ (<https://github.com/zeromq>). Users send  $k$ -mers and the type of output (matching read counts, matching read sequences, or matching reads with sample metadata). The output is returned in JSON format.
