# Supplementary material for: Using reference-free compressed data structures to analyze sequencing reads from thousands of human genomes
Source: HighWire-hosted journal article supplement (doi:10.1101/gr.211748.116), 2016-12-16
Supplement: Supplemental_Materials.docx [file Supplemental_Materials.docx]

**Supplemental materials for:**

**Using reference-free compressed data structures to analyse**

**sequencing reads from thousands of human genomes**

Dirk D. Dolle*1, Zhicheng Liu*1,2, Matthew Cotten1, Jared T. Simpson3,4 , Zamin Iqbal5,

Richard Durbin$1, Shane A. McCarthy§1, Thomas M. Keane§1,2

1 Wellcome Trust Sanger Institute, Hinxton, Cambridge, CB10 1SA, UK

2 European Bioinformatics Institute, Hinxton, Cambridge CB10 1SD, UK

3 Ontario Institute for Cancer Research, Toronto, Ontario, M5G 0A3, Canada

4 Department of Computer Science, University of Toronto, M5S 3G4,Canada

5 Wellcome Trust Centre for Human Genetics, Oxford OX3 7BN, UK

§ Corresponding authors

* These authors contributed equally to this work

Email addresses:

DDD: ddd1@sanger.ac.uk

ZL: zl@ebi.ac.uk

MC: mc13@sanger.ac.uk

JTS: Jared.Simpson@oicr.on.ca

ZI: zam@well.ox.ac.uk

RD: rd@sanger.ac.uk

SAM: sm15@sanger.ac.uk

TMK: tk2@sanger.ac.uk

**Supplemental Table S1:** The 16 population BWT partitions, based on sequence suffix. Total

number of sequences, length, BWT size, index size, and memory usage are given.

**Supplemental Table S2:** 1000GP population BWT server performance comparison for different

values of *k* returning either matching read counts, matching read sequences, or read meta-data

running on the internal network at the Wellcome Trust Sanger Institute.

**Supplemental Table S3:** Results for 1000GP population BWT SNP and indel genotyping for

different size *k*-mers for all chromosome 20 sites compared to the 1000GP Illumina Omni chip

and Genome in a Bottle (indels, NA12878), respectively.

**Supplemental Table S4:** Genes overlapped by not supported 31-mers in GRCh37 and/or

GRCh38. Only genes were selected for which a region annotated as CDS in GENCODE 19 (for

GRCh37) and/or GENCODE 23 (for GRCh38) was hit by a 31-mer.

**Supplemental Table S5:** CPU wall-clock comparison of SNP genotyping for NA12878 using the

two alignment based approaches vs. the 100GP population BWT. For the 1000GP BWT, all of

the 2,705 samples in the BWT were genotyped.

**Supplemental Table S6:** 31-mers sampled from error corrected Illumina platinum genomes

reads from NA12877 (sample not of the 1000BP BWT) and NA12878. Ten random sets of 1.6M

31-mers were queried and matching read counts returned and binned at different matching read

count levels (log10 scale).
