# Supplementary material for: Using reference-free compressed data structures to analyze sequencing reads from thousands of human genomes
Source: HighWire-hosted journal article supplement (doi:10.1101/gr.211748.116), 2016-12-16
Supplement: Supplemental_Table_S1.xlsx [file Supplemental_Table_S1.xlsx]

## Sheet: Sheet1
Suffix	Number of reads	Total length (bp)	Average read length (bp)	BWT size (GB)	Index size (GB)	Memory Size (GB)
AA	4692502809	433057385484	92.2871	39.8563	8.4339	48.2902
AC	3894380618	358780200566	92.1277	33.6607	7.12246	40.7831
AG	3467872699	319801035121	92.2182	29.9538	6.33814	36.292
AT	2975233636	275091723343	92.4605	26.9369	5.69904	32.6359
CA	2599761462	239027623071	91.9421	23.5197	4.976	28.4957
CC	3054341697	280716106776	91.9072	26.2863	5.5621	31.8484
CG	2386861274	218963927666	91.7372	21.4918	4.547	26.0388
CT	3338555072	307694165783	92.1639	29.2195	6.1825	35.402
GA	3834179130	353148989331	92.1055	33.227	7.03063	40.2576
GC	966884243	89384848403	92.4463	9.55475	2.02103	11.5758
GG	3215064230	295835040674	92.0153	27.5347	5.82637	33.3611
GT	3767958044	346717326446	92.0173	32.8012	6.94042	39.7416
TA	3838418168	354885939662	92.4563	33.5227	7.09313	40.6159
TC	3650720884	336258457765	92.1074	32.0077	6.77242	38.7802
TG	2627547680	241985803754	92.0957	23.8913	5.05457	28.9459
TT	4673228798	431533083908	92.3415	39.9861	8.46119	48.4472
Total	52983510444	4882881657753	92.1585	463.451	98.0609	561.511
