# Supplementary material for: Using reference-free compressed data structures to analyze sequencing reads from thousands of human genomes
Source: HighWire-hosted journal article supplement (doi:10.1101/gr.211748.116), 2016-12-16
Supplement: Supplemental_Table_S2.xlsx [file Supplemental_Table_S2.xlsx]

## Sheet: Sheet1
K-mer size	30	40	50	60	70
Read counts only (secs)	94.0049	101.143	103.232	101.265	101.922
Read sequences (secs)	4210.79	2758.09	1395.06	805.577	367.011
Reads returned	919982340	582295186	274996937	135853284	45945770
Meta-data only (secs)	82.1519
