# Supplementary material for: Using reference-free compressed data structures to analyze sequencing reads from thousands of human genomes
Source: HighWire-hosted journal article supplement (doi:10.1101/gr.211748.116), 2016-12-16
Supplement: Supplemental_Table_S3.xlsx [file Supplemental_Table_S3.xlsx]

## Sheet: Sheet1
SNPs	Discordance rate
K-mer (bp)	Homozygous reference	Heterozygous	Homozygous alternative	Total non-reference discordance
31	4.8	13.97	5.69	19.42
34	2.83	13.89	3.94	15.42
39	3.41	14.22	3.94	16.62
INDELs	Discordance rate
K-mer (bp)	Homozygous reference	Heterozygous	Homozygous alternative	Total non-reference discordance
25	NA	32.3	14.13	18.1
31	NA	31.84	14.87	18.57
34	NA	31.72	14.97	18.62
39	NA	31.49	14.94	18.55
