# Supplementary material for: Using reference-free compressed data structures to analyze sequencing reads from thousands of human genomes
Source: HighWire-hosted journal article supplement (doi:10.1101/gr.211748.116), 2016-12-16
Supplement: Supplemental_Table_S4.xlsx [file Supplemental_Table_S4.xlsx]

## Sheet: Sheet1
			GRCh37 specific 31-mers (Gencode 19)		GRCh38 specific 31-mers (Gencode 23)		Shared 31-mers (GRCh37)		Shared 31-mers (GRCh38)
Gene	Type	Ensembl ID	Gene version	CDS bases (bp)	Gene version	CDS bases (bp)	Gene version	CDS bases (bp)	Gene version	CDS bases (bp)			OOXO37(GC19)PC	OOOX38(GC23)PC	OOXX37(GC19)PC	OOXX38(GC23)PC
COL26A1	polymorphic_pseudogene	ENSG00000160963	9	48									0	0	0	0
LEPREL2	polymorphic_pseudogene	ENSG00000110811	15	58									0	0	0	0
NLRC3	polymorphic_pseudogene	ENSG00000167984	12	56									0	0	0	0
PNLIPRP2	polymorphic_pseudogene	ENSG00000165862	10	36									0	0	0	0
ADCYAP1R1	protein_coding	ENSG00000078549	10	2									1	0	0	0
ALDH3B1	protein_coding	ENSG00000006534	11	157									1	0	0	0
ALG9	protein_coding	ENSG00000258529	1	60									1	0	0	0
AOAH	protein_coding	ENSG00000136250	7	49									1	0	0	0
ARHGAP39	protein_coding	ENSG00000147799	7	4									1	0	0	0
ATG9B	protein_coding	ENSG00000181652	14	11									1	0	0	0
B3GNT6	protein_coding	ENSG00000198488	6	118									1	0	0	0
C17orf100	protein_coding	ENSG00000212734	4	53									1	0	0	0
C17orf103	protein_coding	ENSG00000154035	6	58									1	0	0	0
C19orf55	protein_coding	ENSG00000167595	10	55									1	0	0	0
CD207	protein_coding	ENSG00000116031	7	29									1	0	0	0
CLTCL1	protein_coding	ENSG00000070371	11	28									1	0	0	0
COPZ2	protein_coding	ENSG00000005243	5	93									1	0	0	0
CTD-3088G3.8	protein_coding	ENSG00000188897	4	29									1	0	0	0
CTD-3193O13.9	protein_coding	ENSG00000183248	7	30									1	0	0	0
CWC15	protein_coding	ENSG00000150316	7	53									1	0	0	0
DDAH1	protein_coding	ENSG00000153904	14	7									1	0	0	0
EMG1	protein_coding	ENSG00000126749	10	56									1	0	0	0
EPS8L2	protein_coding	ENSG00000177106	10	23									1	0	0	0
FAM120C	protein_coding	ENSG00000184083	7	60									1	0	0	0
FAM58A	protein_coding	ENSG00000147382	14	52									1	0	0	0
FOXD1	protein_coding	ENSG00000251493	2	59									1	0	0	0
GAS2L1	protein_coding	ENSG00000185340	11	58									1	0	0	0
GATSL1	protein_coding	ENSG00000183086	10	62									1	0	0	0
GLYR1	protein_coding	ENSG00000140632	12	54									1	0	0	0
GPSM1	protein_coding	ENSG00000160360	7	52									1	0	0	0
GRIA3	protein_coding	ENSG00000125675	13	27									1	0	0	0
HSH2D	protein_coding	ENSG00000196684	8	39									1	0	0	0
HUWE1	protein_coding	ENSG00000086758	11	45									1	0	0	0
ILK	protein_coding	ENSG00000166333	9	39									1	0	0	0
KIAA1377	protein_coding	ENSG00000110318	9	10									1	0	0	0
KLF14	protein_coding	ENSG00000174595	4	63									1	0	0	0
KMT2B	protein_coding	ENSG00000272333	1	29									1	0	0	0
KRBA1	protein_coding	ENSG00000133619	13	54									1	0	0	0
LAMA4	protein_coding	ENSG00000112769	14	60									1	0	0	0
LTBP4	protein_coding	ENSG00000090006	13	53									1	0	0	0
MAL2	protein_coding	ENSG00000147676	9	56									1	0	0	0
MAPK8IP2	protein_coding	ENSG00000008735	10	58									1	0	0	0
MFN1	protein_coding	ENSG00000171109	14	35									1	0	0	0
MMP28	protein_coding	ENSG00000129270	11	57									1	0	0	0
MPP2	protein_coding	ENSG00000108852	10	60									1	0	0	0
MPV17	protein_coding	ENSG00000115204	10	36									1	0	0	0
MUC2	protein_coding	ENSG00000198788	7	49									1	0	0	0
NAT1	protein_coding	ENSG00000171428	9	22									1	0	0	0
NCAM1	protein_coding	ENSG00000149294	12	104									1	0	0	0
NUDT18	protein_coding	ENSG00000173566	9	65									1	0	0	0
OPLAH	protein_coding	ENSG00000178814	11	53									1	0	0	0
PCNXL3	protein_coding	ENSG00000197136	4	40									1	0	0	0
PCSK6	protein_coding	ENSG00000140479	12	57									1	0	0	0
PHLDB1	protein_coding	ENSG00000019144	12	59									1	0	0	0
PIK3R6	protein_coding	ENSG00000174083	13	52									1	0	0	0
PLCD3	protein_coding	ENSG00000161714	7	51									1	0	0	0
PLEKHA2	protein_coding	ENSG00000169499	10	58									1	0	0	0
POLDIP2	protein_coding	ENSG00000004142	7	106									1	0	0	0
POU3F4	protein_coding	ENSG00000196767	4	59									1	0	0	0
PPP1R9B	protein_coding	ENSG00000108819	9	77									1	0	0	0
PRAMEF1	protein_coding	ENSG00000116721	9	37									1	0	0	0
PRKDC	protein_coding	ENSG00000253729	3	54									1	0	0	0
PTAR1	protein_coding	ENSG00000188647	8	1									1	0	0	0
PWP2	protein_coding	ENSG00000241945	3	12									1	0	0	0
RECQL4	protein_coding	ENSG00000160957	8	55									1	0	0	0
RRBP1	protein_coding	ENSG00000125844	11	33									1	0	0	0
RYK	protein_coding	ENSG00000163785	8	86									1	0	0	0
SBK3	protein_coding	ENSG00000231274	4	52									1	0	0	0
SCAMP1	protein_coding	ENSG00000085365	13	30									1	0	0	0
SCARF2	protein_coding	ENSG00000244486	3	201									1	0	0	0
SENP3	protein_coding	ENSG00000161956	8	47									1	0	0	0
SLC46A1	protein_coding	ENSG00000076351	8	57									1	0	0	0
SMAD5	protein_coding	ENSG00000113658	12	55									1	0	0	0
SRRM3	protein_coding	ENSG00000177679	14	31									1	0	0	0
SSTR3	protein_coding	ENSG00000183473	5	4									1	0	0	0
SYNM	protein_coding	ENSG00000182253	10	56									1	0	0	0
TEX13A	protein_coding	ENSG00000133149	5	63									1	0	0	0
TREH	protein_coding	ENSG00000118094	7	85									1	0	0	0
UBE2O	protein_coding	ENSG00000175931	8	17									1	0	0	0
UNC93B1	protein_coding	ENSG00000110057	3	44									1	0	0	0
VTN	protein_coding	ENSG00000109072	9	54									1	0	0	0
YTHDF3	protein_coding	ENSG00000185728	12	26									1	0	0	0
ZNF274	protein_coding	ENSG00000171606	13	53									1	0	0	0
TRAJ20	TR_J_gene	ENSG00000211869	1	7									0	0	0	0
TRAJ36	TR_J_gene	ENSG00000211853	1	31									0	0	0	0
TRAJ37	TR_J_gene	ENSG00000211852	1	41									0	0	0	0
TRBJ2-1	TR_J_gene	ENSG00000211764	1	28									0	0	0	0
													0	0	0	0
MUC2	processed_transcript	ENSG00000198788			8	0							0	0	0	0
AC234582.1	protein_coding	ENSG00000279487			1	9							0	1	0	0
AC234582.2	protein_coding	ENSG00000279986			1	16							0	1	0	0
ECSCR	protein_coding	ENSG00000249751			3	24							0	1	0	0
ECSCR	protein_coding	ENSG00000279686			1	24							0	1	0	0
FO082796.1	protein_coding	ENSG00000250210			4	16							0	1	0	0
MUC1	protein_coding	ENSG00000185499			16	468							0	1	0	0
NBPF26	protein_coding	ENSG00000273136			5	19							0	1	0	0
ORAI1	protein_coding	ENSG00000276045			1	50							0	1	0	0
POLR2A	protein_coding	ENSG00000181222			14	56							0	1	0	0
													0	0	0	0
IGHD2OR15-2B	IG_D_gene	ENSG00000271305					1	11					0	0	0	0
SSPO	processed_transcript	ENSG00000197558					7	0					0	0	0	0
AC006156.1	protein_coding	ENSG00000225516					2	15					0	0	1	0
C14orf64	protein_coding	ENSG00000246223					4	38					0	0	1	0
C1orf86	protein_coding	ENSG00000162585					12	43					0	0	1	0
FAM230A	protein_coding	ENSG00000188280					7	34					0	0	1	0
FCGBP	protein_coding	ENSG00000090920					9	60					0	0	1	0
HUG1	protein_coding	ENSG00000269259					1	60					0	0	1	0
NPIPB3	protein_coding	ENSG00000169246					12	139					0	0	1	0
PTPLA	protein_coding	ENSG00000165996					9	43					0	0	1	0
RP11-156E8.1	protein_coding	ENSG00000272195					1	61					0	0	1	0
SHANK3	protein_coding	ENSG00000251322					3	75					0	0	1	0
SRCRB4D	protein_coding	ENSG00000146700					8	4					0	0	1	0
													0	0	0	0
RP11-156E8.1	antisense	ENSG00000272195							1	0			0	0	0	0
IGHD2OR15-2B	IG_D_gene	ENSG00000282268							1	11			0	0	0	0
LINC01550	lincRNA	ENSG00000246223							8	0			0	0	0	0
SHANK3	processed_transcript	ENSG00000251322							7	0			0	0	0	0
FAAP20	protein_coding	ENSG00000162585							16	43			0	0	0	1
HACD1	protein_coding	ENSG00000165996							13	43			0	0	0	1
PDE10A	protein_coding	ENSG00000112541							13	61			0	0	0	1
SSC4D	protein_coding	ENSG00000146700							8	4			0	0	0	1
SSPO	protein_coding	ENSG00000197558							11	55			0	0	0	1
													0	0	0	0
ABCB10	protein_coding	ENSG00000135776					4	8	4	8			0	0	1	1
ABL1	protein_coding	ENSG00000097007					13	15	17	15			0	0	1	1
AGAP3	protein_coding	ENSG00000133612					14	81	18	81			0	0	1	1
AOC1	protein_coding	ENSG00000002726					15	60	19	60			0	0	1	1
ARHGDIG	protein_coding	ENSG00000242173					4	28	8	28			0	0	1	1
CAP1	protein_coding	ENSG00000131236					12	100	16	100			0	0	1	1
CCDC102A	protein_coding	ENSG00000135736					5	34	5	34			0	0	1	1
CERS1	protein_coding	ENSG00000223802					3	0	7	17			0	0	0	1
CHD3	protein_coding	ENSG00000170004					12	23	16	23			0	0	1	1
CLIC6	protein_coding	ENSG00000159212					8	61	12	61			0	0	1	1
COL7A1	protein_coding	ENSG00000114270					11	11	15	11			0	0	1	1
CREB3L1	protein_coding	ENSG00000157613					6	25	10	24			0	0	1	1
CTD-2583A14.9	protein_coding	ENSG00000269476					1	41	1	41			0	0	1	1
CTGF	protein_coding	ENSG00000118523					5	68	5	68			0	0	1	1
DIP2A	protein_coding	ENSG00000160305					13	13	17	13			0	0	1	1
DSCR3	protein_coding	ENSG00000157538					9	10	13	10			0	0	1	1
EFCAB2	protein_coding	ENSG00000203666					8	61	12	61			0	0	1	1
EGFL7	protein_coding	ENSG00000172889					11	2	15	2			0	0	1	1
EMC8	protein_coding	ENSG00000131148					4	13	8	13			0	0	1	1
ENO2	protein_coding	ENSG00000111674					4	12	8	12			0	0	1	1
EVPLL	protein_coding	ENSG00000214860					4	14	4	14			0	0	1	1
FMNL1	protein_coding	ENSG00000184922					9	60	13	60			0	0	1	1
FOXO6	protein_coding	ENSG00000204060					4	51	5	51			0	0	1	1
FRRS1L	protein_coding	ENSG00000260230					2	62	2	62			0	0	1	1
GDF1	protein_coding	ENSG00000130283					7	17	8	17			0	0	1	1
GLI2	protein_coding	ENSG00000074047					16	11	20	11			0	0	1	1
GOLGA6L2	protein_coding	ENSG00000174450					7	91	11	91			0	0	1	1
GOLGA8T	protein_coding	ENSG00000261247					1	1	1	1			0	0	1	1
GRIN2C	protein_coding	ENSG00000161509					9	19	13	19			0	0	1	1
HIPK3	protein_coding	ENSG00000110422					7	21	11	21			0	0	1	1
HOMER3	protein_coding	ENSG00000051128					14	56	18	56			0	0	1	1
HS3ST6	protein_coding	ENSG00000162040					5	58	6	14			0	0	1	1
HUNK	protein_coding	ENSG00000142149					4	20	8	20			0	0	1	1
INPP5K	protein_coding	ENSG00000132376					15	14	19	14			0	0	1	1
INSR	protein_coding	ENSG00000171105					9	35	13	35			0	0	1	1
ISCU	protein_coding	ENSG00000136003					11	12	15	12			0	0	1	1
JMJD4	protein_coding	ENSG00000081692					8	38	12	38			0	0	1	1
KIAA0196	protein_coding	ENSG00000164961					11	10	15	10			0	0	1	1
LIMD1	protein_coding	ENSG00000144791					5	21	9	21			0	0	1	1
LUC7L3	protein_coding	ENSG00000108848					11	8	15	8			0	0	1	1
MB	protein_coding	ENSG00000198125					8	19	12	19			0	0	1	1
MCTP1	protein_coding	ENSG00000175471					15	15	19	15			0	0	1	1
MMP24	protein_coding	ENSG00000125966					8	13	9	13			0	0	1	1
MUC12	protein_coding	ENSG00000205277					5	45	9	45			0	0	1	1
MXRA8	protein_coding	ENSG00000162576					12	2	16	2			0	0	1	1
MYH7B	protein_coding	ENSG00000078814					11	8	15	8			0	0	1	1
MYL7	protein_coding	ENSG00000106631					4	33	8	33			0	0	1	1
NDUFB11	protein_coding	ENSG00000147123					10	4	10	4			0	0	1	1
NOL10	protein_coding	ENSG00000115761					11	2	15	2			0	0	1	1
NPW	protein_coding	ENSG00000183971					5	47	5	47			0	0	1	1
NVL	protein_coding	ENSG00000143748					13	19	17	19			0	0	1	1
PACS1	protein_coding	ENSG00000175115					7	34	11	34			0	0	1	1
PALD1	protein_coding	ENSG00000107719					8	9	8	9			0	0	1	1
PHLDA1	protein_coding	ENSG00000139289					9	33	13	33			0	0	1	1
PID1	protein_coding	ENSG00000153823					14	12	18	12			0	0	1	1
PIK3IP1	protein_coding	ENSG00000100100					8	7	12	7			0	0	1	1
PLEKHG5	protein_coding	ENSG00000171680					16	6	20	6			0	0	1	1
POLD2	protein_coding	ENSG00000106628					6	1	10	1			0	0	1	1
POLR2E	protein_coding	ENSG00000099817					7	37	11	37			0	0	1	1
POU4F1	protein_coding	ENSG00000152192					6	51	7	51			0	0	1	1
PPFIA4	protein_coding	ENSG00000143847					11	57	15	57			0	0	1	1
PRDM15	protein_coding	ENSG00000141956					9	41	13	41			0	0	1	1
PROM2	protein_coding	ENSG00000155066					11	18	15	18			0	0	1	1
RAB11FIP3	protein_coding	ENSG00000090565					11	66	15	66			0	0	1	1
RAPGEF4	protein_coding	ENSG00000091428					13	22	17	22			0	0	1	1
RHBDF1	protein_coding	ENSG00000007384					11	12	15	12			0	0	1	1
RNF19B	protein_coding	ENSG00000116514					12	61	16	61			0	0	1	1
SAMD1	protein_coding	ENSG00000141858					7	54	11	54			0	0	1	1
SAMD11	protein_coding	ENSG00000187634					6	36	10	36			0	0	1	1
SDHAF1	protein_coding	ENSG00000205138					2	47	3	47			0	0	1	1
SEC24B	protein_coding	ENSG00000138802					7	18	11	18			0	0	1	1
SEPT7	protein_coding	ENSG00000122545					13	13	17	11			0	0	1	1
SEPT9	protein_coding	ENSG00000184640					13	9	17	9			0	0	1	1
SLAIN1	protein_coding	ENSG00000139737					17	67	21	67			0	0	1	1
SLC22A16	protein_coding	ENSG00000004809					9	16	13	16			0	0	1	1
SLC22A18	protein_coding	ENSG00000110628					9	17	13	17			0	0	1	1
SLC28A1	protein_coding	ENSG00000156222					7	4	11	4			0	0	1	1
SLC37A4	protein_coding	ENSG00000137700					12	57	16	57			0	0	1	1
SLC6A8	protein_coding	ENSG00000130821					11	26	15	26			0	0	1	1
SNAP47	protein_coding	ENSG00000143740					10	1	14	1			0	0	1	1
SNX19	protein_coding	ENSG00000120451					6	16	10	16			0	0	1	1
SOGA1	protein_coding	ENSG00000149639					10	60	14	60			0	0	1	1
SON	protein_coding	ENSG00000159140					13	56	17	56			0	0	1	1
SOWAHC	protein_coding	ENSG00000198142					3	61	4	61			0	0	1	1
SPATA7	protein_coding	ENSG00000042317					12	48	16	48			0	0	1	1
SSBP4	protein_coding	ENSG00000130511					11	74	15	74			0	0	1	1
STRAP	protein_coding	ENSG00000023734					6	12	10	12			0	0	1	1
TACR2	protein_coding	ENSG00000075073					10	12	14	12			0	0	1	1
TAF4	protein_coding	ENSG00000130699					12	95	16	95			0	0	1	1
TCF15	protein_coding	ENSG00000125878					4	61	5	61			0	0	1	1
TENM4	protein_coding	ENSG00000149256					10	12	14	12			0	0	1	1
TMEM235	protein_coding	ENSG00000204278					8	61	12	14			0	0	1	1
TTC3	protein_coding	ENSG00000182670					9	20	13	20			0	0	1	1
USP22	protein_coding	ENSG00000124422					7	9	11	9			0	0	1	1
VNN2	protein_coding	ENSG00000112303					9	36	13	36			0	0	1	1
VPS51	protein_coding	ENSG00000149823					3	58	7	58			0	0	1	1
VSIG10L	protein_coding	ENSG00000186806					5	27	5	27			0	0	1	1
WDR26	protein_coding	ENSG00000162923					10	10	14	10			0	0	1	1
WISP1	protein_coding	ENSG00000104415					9	1	13	1			0	0	1	1
WWC3	protein_coding	ENSG00000047644					13	0	17	83			0	0	0	1
ZNF417	protein_coding	ENSG00000173480					6	41	10	41			0	0	1	1
ZSWIM6	protein_coding	ENSG00000130449					5	59	5	59			0	0	1	1
													0	0	0	0
SRSF8	polymorphic_pseudogene	ENSG00000271885	1	57			1	0					0	0	0	0
LCA10	protein_coding	ENSG00000196987	2	48			2	109					1	0	1	0
SLC5A3	protein_coding	ENSG00000272962	1	0			1	5					0	0	1	0
													0	0	0	0
FCGBP	protein_coding	ENSG00000275395			4	46			4	60			0	1	0	1
													0	0	0	0
PPP1R3G	protein_coding	ENSG00000219607	2	61					3	0			1	0	0	0
													0	0	0	0
MUC3A	protein_coding	ENSG00000169894	13	0	17	61							0	1	0	0
MUC5AC	protein_coding	ENSG00000215182	6	0	8	130							0	1	0	0
													0	0	0	0
ARMC9	protein_coding	ENSG00000135931	13	0			13	60	17	60			0	0	1	1
IQSEC1	protein_coding	ENSG00000144711	9	58			9	0	13	0			1	0	0	0
N6AMT1	protein_coding	ENSG00000156239	7	48			7	0	11	0			1	0	0	0
NHS	protein_coding	ENSG00000188158	10	0			10	17	14	42			0	0	1	1
NPRL3	protein_coding	ENSG00000103148	11	57			11	0	15	0			1	0	0	0
PCNT	protein_coding	ENSG00000160299	12	8			12	0	16	0			1	0	0	0
SARM1	protein_coding	ENSG00000004139	9	250			9	0	13	0			1	0	0	0
SLC5A3	protein_coding	ENSG00000198743	5	0			5	5	5	5			0	0	1	1
TMEM199	protein_coding	ENSG00000244045	6	121			6	0	10	0			1	0	0	0
ZNF598	protein_coding	ENSG00000167962	8	61			8	125	12	125			1	0	1	1
				5112		919		4057		3668			88	12	117	112
				9169		4587							205		124
