# Supplementary material for: Using reference-free compressed data structures to analyze sequencing reads from thousands of human genomes
Source: HighWire-hosted journal article supplement (doi:10.1101/gr.211748.116), 2016-12-16
Supplement: Supplemental_Table_S5.xlsx [file Supplemental_Table_S5.xlsx]

## Sheet: Sheet1
Stage	Samtools	GATK	1000G BWT
BWA alignment	97228.1	97228.1
Sorting/indexing CRAM	2305.13	2305.13
Error correction			8597.18
Sorting/deduplication			98927.4
BWT construction/indexing			15549.6
SNP genotyping	640.76	6543.74	452331
Total (seconds)	100174	106077	575405
