# Supplementary material for: Using reference-free compressed data structures to analyze sequencing reads from thousands of human genomes
Source: HighWire-hosted journal article supplement (doi:10.1101/gr.211748.116), 2016-12-16
Supplement: Supplemental_Table_S6.xlsx [file Supplemental_Table_S6.xlsx]

## Sheet: Sheet1
NA12877												NA12878
Random set	#1	#2	#3	#4	#5	#6	#7	#8	#9	#10		Random set	#1	#2	#3	#4	#5	#6	#7	#8	#9	#10
Generated	16263612	16263612	16263612	16263612	16263612	16263612	16263612	16263612	16263612	16263612		Generated	15745302	15745302	15745302	15745302	15745302	15745302	15745302	15745302	15745302	15745302
Queried	16246971	16247005	16247099	16247017	16246865	16246819	16246941	16247021	16246965	16247044		Queried	15720242	15720430	15720441	15720387	15720176	15720591	15720916	15720550	15720462	15720433
Discarded	16641	16607	16513	16595	16747	16793	16671	16591	16647	16568		Discarded	25060	24872	24861	24915	25126	24711	24386	24752	24840	24869
PopulationBWT 31-mer support level (left-closed, right-open bins)												PopulationBWT 31-mer support level (left-closed, right-open bins)
0	155812	155919	155521	156709	155735	156383	155986	155931	155672	156543		0	175875	175821	175693	175573	175215	175724	175726	175008	175855	176090
1	5668	5783	5769	5809	5674	5782	5707	5796	5883	5790		1	7586	7381	7426	7506	7599	7445	7638	7403	7565	7414
2	2645	2571	2613	2594	2631	2641	2556	2661	2646	2573		2	3200	3218	3291	3394	3212	3244	3280	3253	3268	3208
3	1419	1461	1482	1455	1450	1459	1494	1519	1521	1424		3	1833	1792	1869	1801	1818	1825	1832	1832	1890	1769
4	930	891	968	931	884	921	911	942	957	967		4	1159	1187	1106	1265	1150	1160	1111	1177	1156	1204
5	662	699	658	690	671	661	635	692	623	625		5	886	799	815	850	816	872	816	826	745	787
6	540	517	547	507	529	500	522	552	518	523		6	614	642	629	610	633	645	608	639	618	643
7	445	417	471	434	459	427	451	435	447	469		7	468	539	545	510	502	512	530	493	551	539
8	408	393	394	380	375	399	373	356	388	371		8	446	438	471	414	450	470	415	440	456	452
9	373	343	330	373	365	337	349	341	368	343		9	410	372	387	409	392	417	374	421	402	378
10	2473	2486	2464	2484	2516	2433	2490	2442	2503	2513		10	2720	2710	2746	2708	2699	2775	2724	2784	2765	2763
20	1606	1693	1632	1742	1716	1622	1698	1628	1710	1607		20	1923	1900	1860	1908	1846	1852	1892	1783	1856	1895
30	1401	1415	1405	1389	1374	1496	1483	1450	1467	1384		30	1502	1598	1495	1588	1554	1462	1560	1629	1552	1525
40	1313	1299	1371	1355	1298	1325	1376	1371	1363	1349		40	1500	1446	1484	1432	1397	1437	1455	1479	1442	1461
50	1313	1298	1395	1393	1393	1284	1325	1314	1237	1333		50	1325	1380	1380	1397	1344	1313	1367	1390	1349	1300
60	1339	1273	1316	1333	1298	1222	1317	1253	1316	1232		60	1323	1280	1368	1376	1316	1264	1355	1325	1267	1335
70	1337	1346	1371	1361	1288	1294	1284	1338	1313	1308		70	1314	1363	1352	1325	1345	1331	1342	1344	1295	1362
80	1348	1447	1402	1441	1410	1423	1439	1399	1433	1375		80	1358	1358	1345	1402	1371	1398	1407	1364	1410	1386
90	1552	1456	1526	1564	1532	1479	1529	1493	1576	1540		90	1479	1456	1549	1478	1517	1438	1492	1473	1511	1438
100	55859	56032	56300	56190	56417	56043	56049	55942	56136	55990		100	41052	41174	40873	40898	40956	41016	41122	40880	40809	41004
200	169616	170103	170431	170584	169821	169523	169854	170130	170307	170515		200	153452	154086	153699	154351	153637	154328	153482	153488	153709	154166
300	1090309	1088334	1087607	1087957	1088185	1088755	1088847	1087899	1085964	1088781		300	1128379	1128008	1127121	1127700	1128529	1127151	1127238	1127990	1126418	1127190
400	3774650	3774815	3777835	3775537	3775246	3774712	3773381	3778128	3777939	3774385		400	3631402	3628517	3629405	3625285	3627070	3628413	3627952	3628693	3628574	3632968
500	3285624	3288137	3282823	3286139	3285244	3285603	3286862	3287981	3284348	3286690		500	3153212	3155646	3153674	3155073	3153516	3151971	3153914	3153940	3151593	3150751
600	1699710	1698835	1699401	1698400	1701107	1699392	1701534	1698195	1700271	1698929		600	1638593	1640909	1638434	1641032	1639407	1639378	1641176	1639771	1640635	1639545
700	823802	822643	824051	823071	823850	824961	824120	822501	822824	824296		700	798047	796059	799448	796851	798227	798902	797123	798132	797585	799374
800	461333	460066	461044	460686	459113	461108	460037	461034	461819	460178		800	447065	447560	447087	447860	447202	448656	447525	447869	447201	446308
900	310509	311283	311664	311425	310282	310389	311351	311135	311825	311135		900	301285	301531	300748	301730	301187	302011	301589	302797	303337	301999
1000	1152056	1153761	1153779	1153612	1155036	1152410	1153674	1153179	1153782	1153660		1000	1114735	1112775	1112079	1113325	1114990	1114569	1113657	1114314	1114615	1113347
2000	340070	339111	340365	340380	339538	339593	338295	339977	339655	340501		2000	327695	327737	329286	328937	328825	328091	329528	328672	329028	328752
3000	217085	217404	217262	216333	216312	216747	217811	215480	216744	216561		3000	210494	210093	210290	210233	210226	210016	210392	210540	211291	209677
4000	158159	158522	158624	158220	158296	158423	158148	158247	157956	158264		4000	153202	152848	153321	152883	152527	153170	153342	153384	153401	153335
5000	110351	110254	110554	109941	110129	110671	110168	109745	109969	110348		5000	105556	106320	107083	106623	106449	106666	106530	106173	106063	106424
6000	75462	75946	75609	75504	75528	76025	75703	75688	75206	75140		6000	72788	72849	73037	72805	72751	72482	72570	72277	72768	72549
7000	55365	55540	55107	55013	55527	55627	56005	55638	55243	55227		7000	53702	52725	53315	53466	53342	53122	53326	53038	53174	53231
8000	44254	44059	44402	44607	43958	44480	44471	44559	44348	44090		8000	42722	42629	42572	42468	42937	42840	42450	42792	42691	42853
9000	37480	37793	37189	37449	37882	37606	37713	37609	37055	37601		9000	35962	36076	35817	36138	36150	35718	35899	35906	36215	36110
10000	230997	231363	230197	230263	231459	229697	229853	230533	231199	230739		10000	221872	222467	221829	222642	222034	221330	221798	221407	222457	222163
20000	160845	161007	160557	160831	161141	161091	161193	160335	160967	161007		20000	143018	143062	143400	142714	143096	143235	142723	143123	142818	143059
30000	84185	83601	84632	84506	84385	84749	84049	84431	84370	84192		30000	81312	81871	81633	81859	81710	82032	82042	81517	81638	81676
40000	65621	65238	64820	65252	65412	65486	65011	65274	65575	64990		40000	63445	63064	63319	63319	62798	62953	63326	63224	63414	63200
50000	54885	54855	54736	54782	54723	54841	54496	54840	54865	54646		50000	52610	53015	53030	53388	52926	53079	52804	53012	53105	52930
60000	47898	47981	47509	47796	47698	47623	47596	47584	47532	47710		60000	46376	46488	46565	46402	46503	46188	46133	46479	46452	46526
70000	42081	42238	42211	42101	42162	42092	42321	42152	42071	42070		70000	42076	42216	42026	41744	42248	42113	42216	41975	41998	42135
80000	37748	37505	37622	37775	37560	37845	37732	37907	37942	37917		80000	37680	37621	37684	37602	37814	37775	38098	37713	37782	37295
90000	34762	34832	34745	34664	34574	34701	34790	34626	34889	34879		90000	35380	35714	35808	35379	35242	35283	35144	35108	34925	35367
100000	228452	228301	228061	228643	228970	229001	228468	228626	228339	228599		100000	222541	223127	223134	222989	223422	223298	222638	222861	222485	222224
200000	119744	119712	120091	120259	120368	120307	120179	119845	119798	119701		200000	114908	114856	115088	115064	115164	115168	114853	114903	115162	114970
300000	88156	88141	88094	88133	88138	88129	88182	88502	88248	88212		300000	83483	83435	83506	83504	83785	83847	83989	83742	83383	83307
400000	74454	74194	74148	74249	74138	74054	74140	74131	74326	74367		400000	67550	67574	67438	67363	67338	67399	67437	67382	67548	67550
500000	64278	64286	64299	64175	64206	64118	64023	64040	64071	64177		500000	50186	50161	50142	50282	50283	50317	50264	50137	50130	50196
600000	45684	45597	45536	45401	45332	45395	45408	45431	45546	45509		600000	38691	38726	38686	38767	38792	38775	38760	38693	38627	38628
700000	34706	34688	34781	34808	34778	34791	34806	34784	34675	34653		700000	33273	33145	33147	33100	33123	33056	33180	33127	33098	33205
800000	29399	29334	29346	29313	29307	29307	29348	29379	29367	29352		800000	27954	27954	27907	27906	27920	27938	27929	27873	27802	27853
900000	30040	30005	29954	30026	29912	29953	29990	30061	30020	30061		900000	29007	28995	28994	29065	29046	28996	28984	28931	28912	28974
1000000	193049	193239	193338	193443	193099	192997	192911	192963	193103	192970		1000000	190841	190986	191252	191029	191129	191064	191115	190967	190978	190902
2000000	99977	99875	99888	99834	99792	99800	99847	99915	99960	99944		2000000	95350	95394	95431	95444	95414	95363	95420	95355	95332	95334
3000000	72452	72431	72480	72506	72427	72469	72402	72436	72452	72419		3000000	73222	73163	73117	73060	73077	73086	73113	73140	73178	73226
4000000	57938	57927	57954	57984	58007	57934	57973	58010	57980	57987		4000000	56870	56875	56920	56893	56897	56873	56874	56859	56829	56889
5000000	48582	48554	48601	48575	48545	48567	48561	48530	48548	48569		5000000	46760	46744	46740	46715	46718	46714	46713	46710	46725	46729
6000000	37196	37212	37207	37197	37189	37193	37185	37162	37192	37215		6000000	35962	35966	35971	35967	35978	36009	35993	35996	35984	35980
7000000	29960	29954	29968	29954	29967	29977	29979	29962	29972	29975		7000000	29741	29718	29729	29737	29745	29726	29756	29767	29745	29737
8000000	24275	24271	24268	24247	24261	24286	24266	24284	24285	24286		8000000	23597	23600	23586	23587	23565	23564	23565	23566	23594	23595
9000000	17664	17663	17643	17639	17639	17634	17636	17645	17645	17674		9000000	16983	16970	16958	16945	16965	16958	16972	16971	16977	16987
10000000	69150	69138	69180	69131	69107	69100	69114	69136	69176	69143		10000000	65070	65090	65099	65108	65119	65145	65133	65091	65107	65041
20000000	25614	25622	25632	25620	25604	25616	25633	25625	25620	25620		20000000	25620	25618	25623	25629	25635	25614	25601	25597	25610	25620
30000000	14001	14004	14011	14007	13997	14013	14004	14009	14005	13996		30000000	13840	13830	13828	13836	13834	13847	13841	13837	13829	13825
40000000	8670	8668	8674	8677	8668	8666	8671	8661	8667	8671		40000000	9020	9026	9022	9023	9020	9015	9017	9021	9029	9026
50000000	4101	4099	4098	4099	4099	4099	4096	4102	4103	4107		50000000	4092	4095	4090	4087	4081	4091	4089	4091	4092	4094
60000000	3684	3682	3681	3686	3686	3687	3687	3686	3682	3681		60000000	3614	3613	3615	3613	3614	3614	3615	3613	3615	3616
70000000	2312	2314	2313	2309	2308	2310	2310	2308	2312	2310		70000000	2216	2213	2208	2213	2215	2219	2216	2217	2216	2216
80000000	3035	3032	3037	3036	3035	3033	3033	3030	3035	3037		80000000	3089	3089	3093	3089	3093	3093	3095	3095	3094	3093
90000000	1948	1949	1951	1950	1950	1951	1949	1950	1950	1948		90000000	1845	1845	1843	1840	1842	1842	1846	1847	1846	1847
100000000	6621	6623	6630	6629	6629	6626	6625	6619	6619	6622		100000000	7087	7087	7084	7082	7089	7091	7091	7090	7091	7089
200000000	145	145	145	145	145	143	143	143	143	144		200000000	238	238	238	238	239	239	239	239	239	239
300000000	0	0	0	0	0	0	0	0	0	0		300000000	0	0	0	0	0	0	0	0	0	0
400000000	0	0	0	0	0	0	0	0	0	0		400000000	0	0	0	0	0	0	0	0	0	0
500000000	0	0	0	0	0	0	0	0	0	0		500000000	0	0	0	0	0	0	0	0	0	0
600000000	6668	6664	6663	6664	6664	6667	6668	6669	6669	6670		600000000	5716	5714	5716	5716	5716	5715	5712	5712	5713	5715
700000000	0	0	0	0	0	0	0	0	0	0		700000000	0	0	0	0	0	0	0	0	0	0
800000000	0	0	0	0	0	0	0	0	0	0		800000000	0	0	0	0	0	0	0	0	0	0
900000000	0	0	0	0	0	0	0	0	0	0		900000000	0	0	0	0	0	0	0	0	0	0
1000000000	1716	1716	1716	1716	1715	1715	1715	1715	1715	1715		1000000000	1843	1843	1842	1843	1843	1843	1843	1843	1843	1843
